# Supplementary material
Source: Royal Society of Chemistry journal article supplement (doi:10.1039/d6ta02584f)
Supplement: d6ta02584f1.pdf [file d6ta02584f1.pdf]

## Supporting Information

### **Tuning local Lewis acidity in transition-metal-doped Nb<sub>2</sub>C MXenes for enhanced urea electrosynthesis**

Lianming Zhao,\* Yuan Li,<sup>a</sup> Xueru Wang,<sup>a</sup> Wenxi Han,<sup>a</sup> Jinghao Zhang,<sup>a</sup> Jifa Fu,<sup>a</sup> Yuqi Qiu,<sup>a</sup> Xiaojie Liu,<sup>a</sup> Wenxuan An,<sup>a</sup> Zhanchi Zhao,<sup>a</sup> GuangZhao,<sup>b</sup> Wei Xing<sup>a</sup> and Jing Xu\*<sup>a</sup>

<sup>a</sup> Shandong Key Laboratory of Intelligent Energy Materials, School of Materials Science and Engineering, China University of Petroleum (East China), Qingdao, Shandong 266580, China

<sup>b</sup> School of Petroleum Engineering, China University of Petroleum (East China), Qingdao, Shandong 266580, China

\*Corresponding authors.

E-mail addresses: lmzhao@upc.edu.cn (L. Zhao), and xujing@upc.edu.cn (J. Xu).

## Table of contents

|                                                                                                                                                                                                  |      |
|--------------------------------------------------------------------------------------------------------------------------------------------------------------------------------------------------|------|
| 1. Computational details.....                                                                                                                                                                    | S-3  |
| 2. The optimized structure of Nb <sub>2</sub> C and TM@Nb <sub>2</sub> C.....                                                                                                                    | S-5  |
| 3. Schematic illustration of Nb sites at varying distances from the TM dopant in TM@Nb <sub>2</sub> C for charge (acidity) gradient analysis.....                                                | S-6  |
| 4. The optimized adsorption configurations for N <sub>2</sub> on the Nb <sub>2</sub> C and TM@Nb <sub>2</sub> C monolayers. ....                                                                 | S-7  |
| 5. The optimized adsorption configurations for N <sub>2</sub> on the TM@Nb <sub>2</sub> C monolayers..                                                                                           | S-8  |
| 6. Mean ICOHP values for the side-on adsorbed N <sub>2</sub> .....                                                                                                                               | S-9  |
| 7. Schematic illustration of the NRR process.....                                                                                                                                                | S-10 |
| 8. Free energy diagrams for urea electrosynthesis on Nb <sub>2</sub> C, Sc@Nb <sub>2</sub> C, Ti@Nb <sub>2</sub> C, V@Nb <sub>2</sub> C, Cr@Nb <sub>2</sub> C, and Mn@Nb <sub>2</sub> C.....     | S-11 |
| 9. Free energy diagrams for urea electrosynthesis on Fe@Nb <sub>2</sub> C, Co@Nb <sub>2</sub> C, Ni@Nb <sub>2</sub> C, Zr@Nb <sub>2</sub> C, Mo@Nb <sub>2</sub> C, and Ru@Nb <sub>2</sub> C..... | S-12 |
| 10. Free energy diagrams for urea electrosynthesis on Rh@Nb <sub>2</sub> C, Pd@Nb <sub>2</sub> C, and Ag@Nb <sub>2</sub> C.....                                                                  | S-13 |
| 11. Free energy diagram for urea electrosynthesis on Cu@Nb <sub>2</sub> C including solvent effects.....                                                                                         | S-14 |
| 12. AIMD simulations of Cu@Nb <sub>2</sub> C.....                                                                                                                                                | S-15 |
| 13. Volcano plots of $\Delta FIA_{solv}^{TM@Nb_2C}$ versus $U_L$ with the reference zero set to the solvated fluoride ion affinity of Mo@Nb <sub>2</sub> C and Pd@Nb <sub>2</sub> C.....         | S-16 |
| 14. Calculated Hirshfeld charges on TM@Nb <sub>2</sub> C.....                                                                                                                                    | S-17 |
| 15. Calculated adsorption energy of *N <sub>2</sub> on TM@Nb <sub>2</sub> C.....                                                                                                                 | S-18 |
| 16. N–N and C–O bond lengths for N <sub>2</sub> and CO co-adsorbed on TM@Nb <sub>2</sub> C.....                                                                                                  | S-19 |
| 17. Calculated adsorption energy of *N <sub>2</sub> and *CO in their co-adsorption state on TM@Nb <sub>2</sub> C.....                                                                            | S-20 |

## Computational details

Fluoride ion affinity (FIA) serves as a quantitative descriptor for Lewis acidity. It was defined as the negative enthalpy change ( $-\Delta H$ ) associated with the binding of a Lewis acid (LA) to a fluoride ion ( $F^-$ ), calculated as:

$$\text{FIA} = -\Delta H = -(\Delta E + \Delta ZPE) \quad (1)$$

where  $\Delta E$  is the total energy difference and  $\Delta ZPE$  is the zero-point energy correction.

To evaluate the fluoride-binding capability of LA, we employed hydrogen fluoride (HF) as an indirect probe and examined the following exchange reactions:

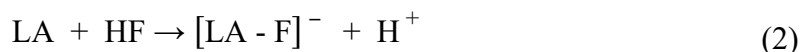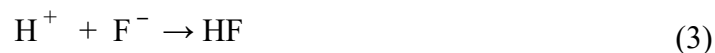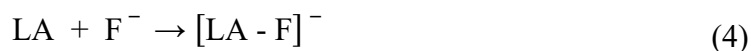

Summing Eqs. (2) and (3) yields the net reaction shown in Eq. (4), which represents the direct interaction between the Lewis acid and the fluoride ion.

To enhance the reliability of the FIA values, we prioritized solvated-phase results over gas-phase ones. The relevant solvation processes were defined as:

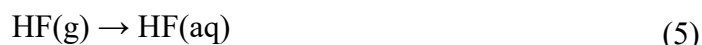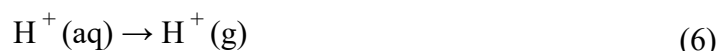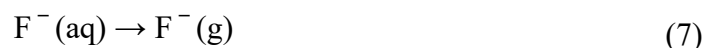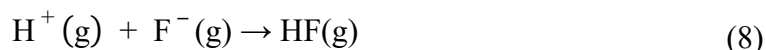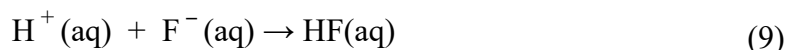

The enthalpy change for Eq. (9) was determined by summing the values for Eqs. (5–8). Based on standard-state thermochemical data at 298.15 K and 1 atm, the individual enthalpy changes are:  $\Delta H_5 = -47 \text{ kJ mol}^{-1}$ ,<sup>1</sup>  $\Delta H_6 = 1091 \text{ kJ mol}^{-1}$ ,  $\Delta H_7 = 515 \text{ kJ mol}^{-1}$ ,<sup>2</sup>  $\Delta H_8 = -1555 \text{ kJ mol}^{-1}$ .<sup>3</sup> Consequently, the net enthalpy change for Eq. (9) was

calculated as:  $\Delta H_9 = \Delta H_5 + \Delta H_6 + \Delta H_7 + \Delta H_8 = 4 \text{ kJ mol}^{-1}$ . This small positive value indicates that the solvation process described in Eq. (9) is slightly endothermic.

Therefore, the solvated fluoride ion affinity ( $FIA_{solv}^{TM@Nb_2C}$ ) at the TM site on  $TM@Nb_2C$  was calculated as:

$$FIA_{solv}^{TM@Nb_2C} = -(\Delta H_2^{TM@Nb_2C} + \Delta H_9) \quad (10)$$

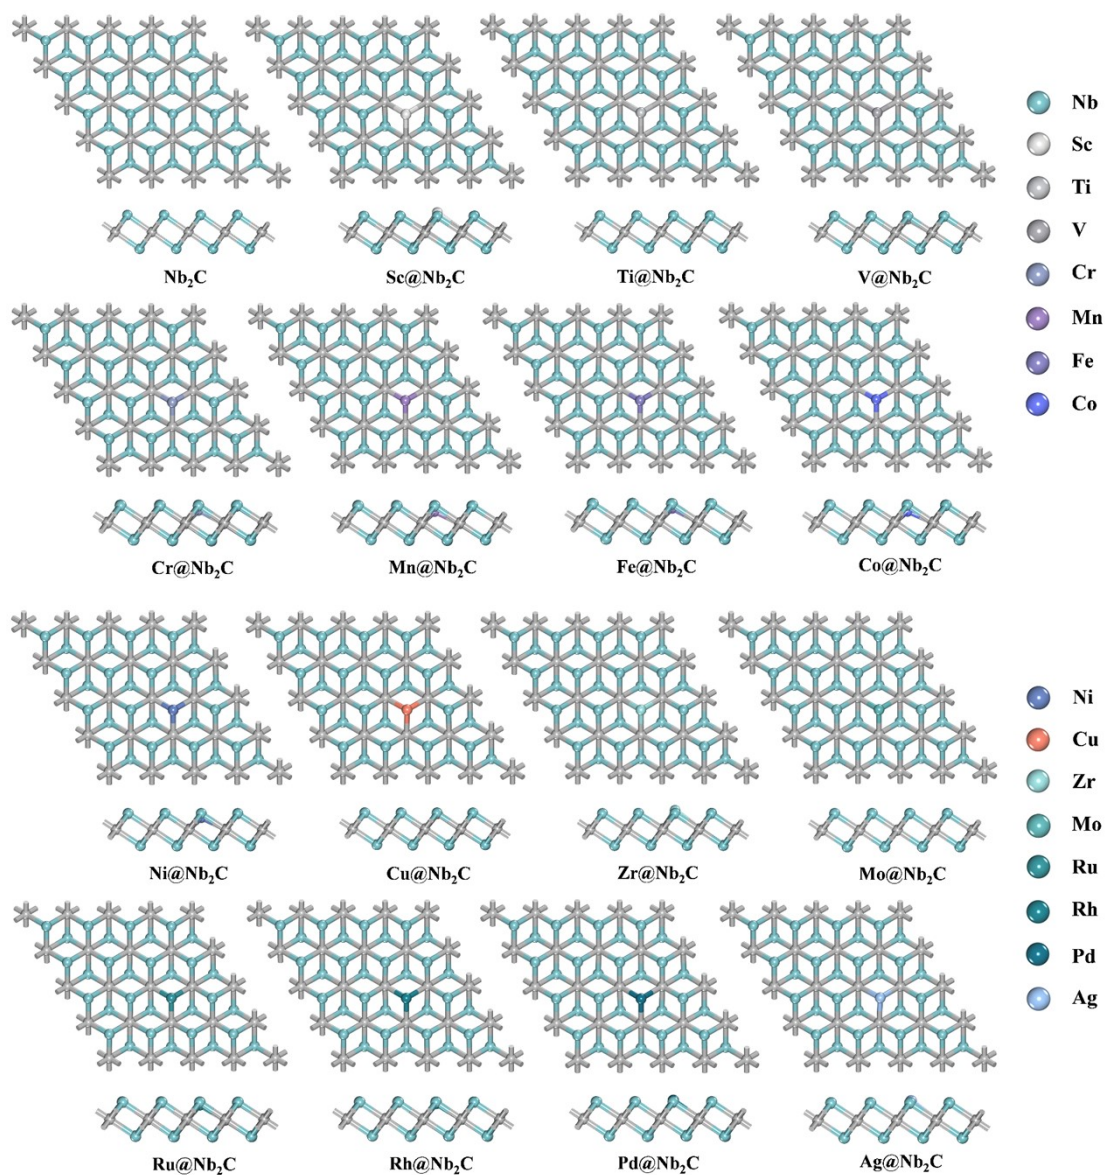

Fig. S1 Top and side views of the optimized structure of  $\text{Nb}_2\text{C}$  and  $\text{TM@Nb}_2\text{C}$ .

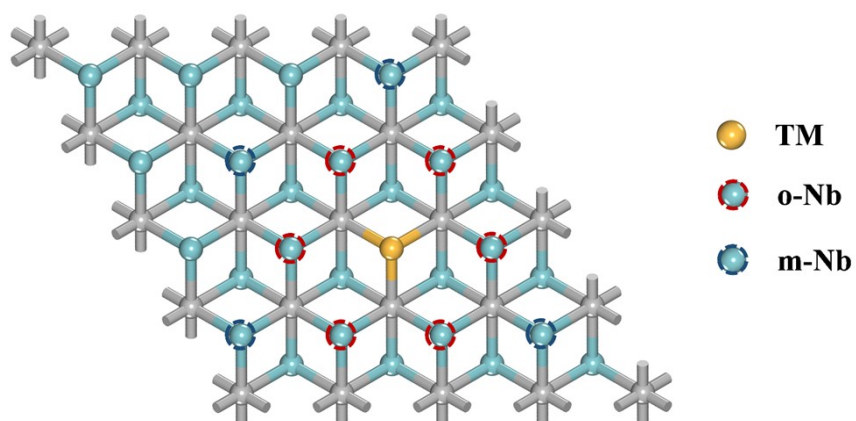

Fig. S2 Schematic illustration of Nb sites at varying distances from the TM dopant in  $\text{TM@Nb}_2\text{C}$  for charge (acidity) gradient analysis. The TM atom is highlighted in gold. Nb atoms in the nearest proximity to the TM site are denoted as o-Nb (red dashed circles), while those in the next-nearest positions are denoted as m-Nb (blue dashed circles).

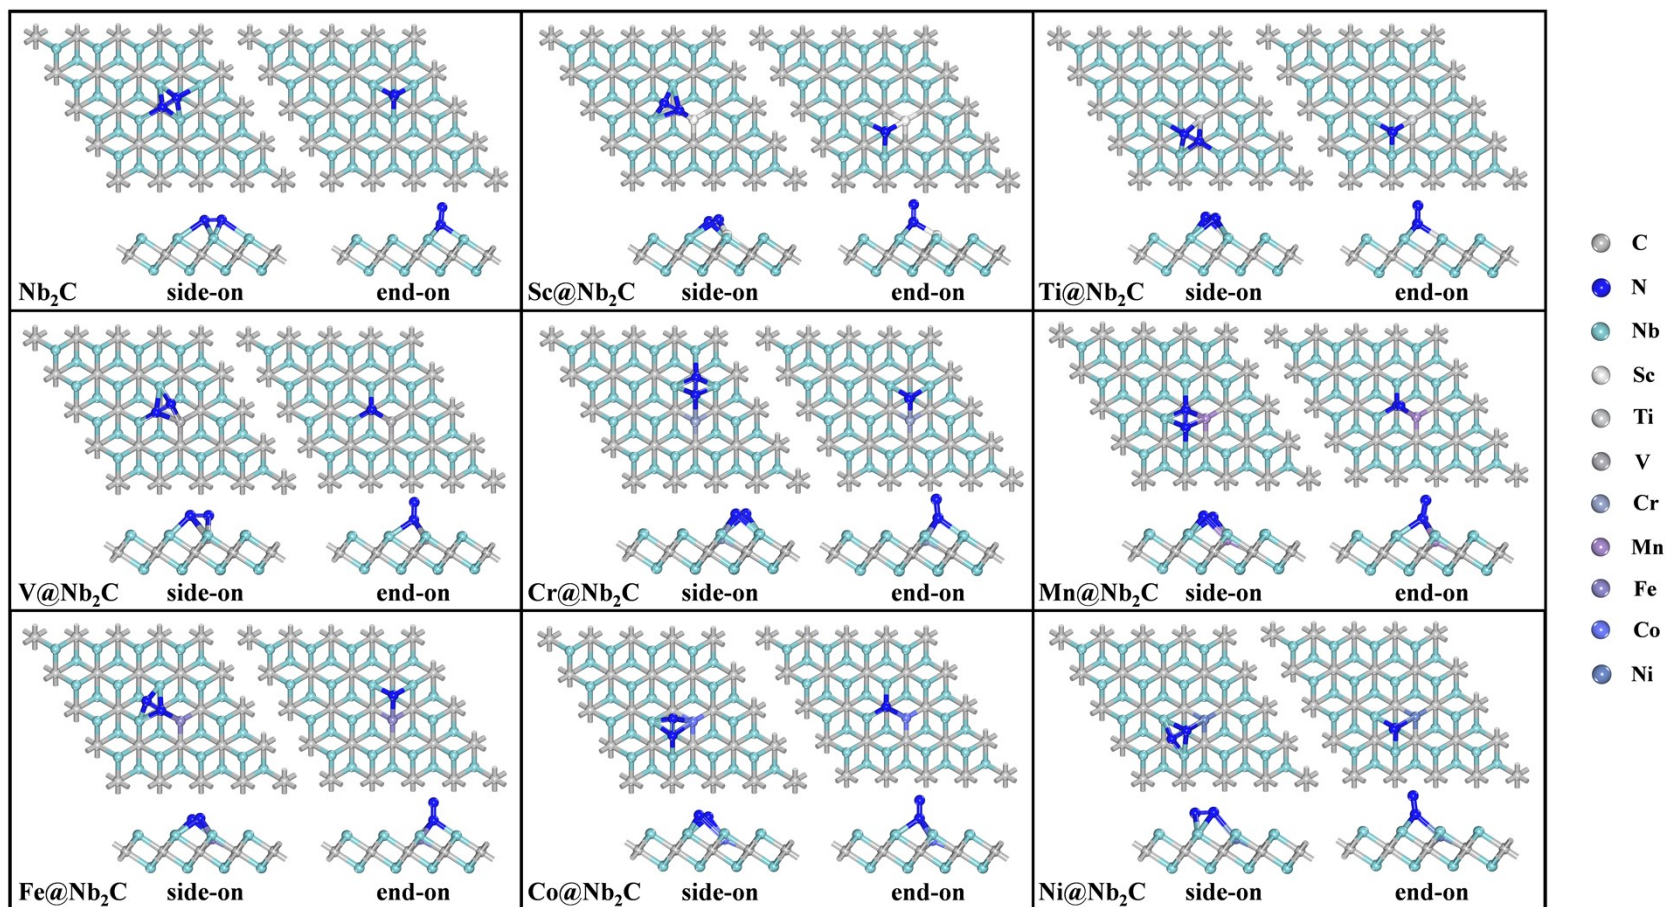

Fig. S3 Top and side views of the optimized adsorption configurations for  $N_2$  on  $Nb_2C$  and  $TM@Nb_2C$  ( $TM = Sc, Ti, V, Cr, Mn, Fe, Co,$  and  $Ni$ ).

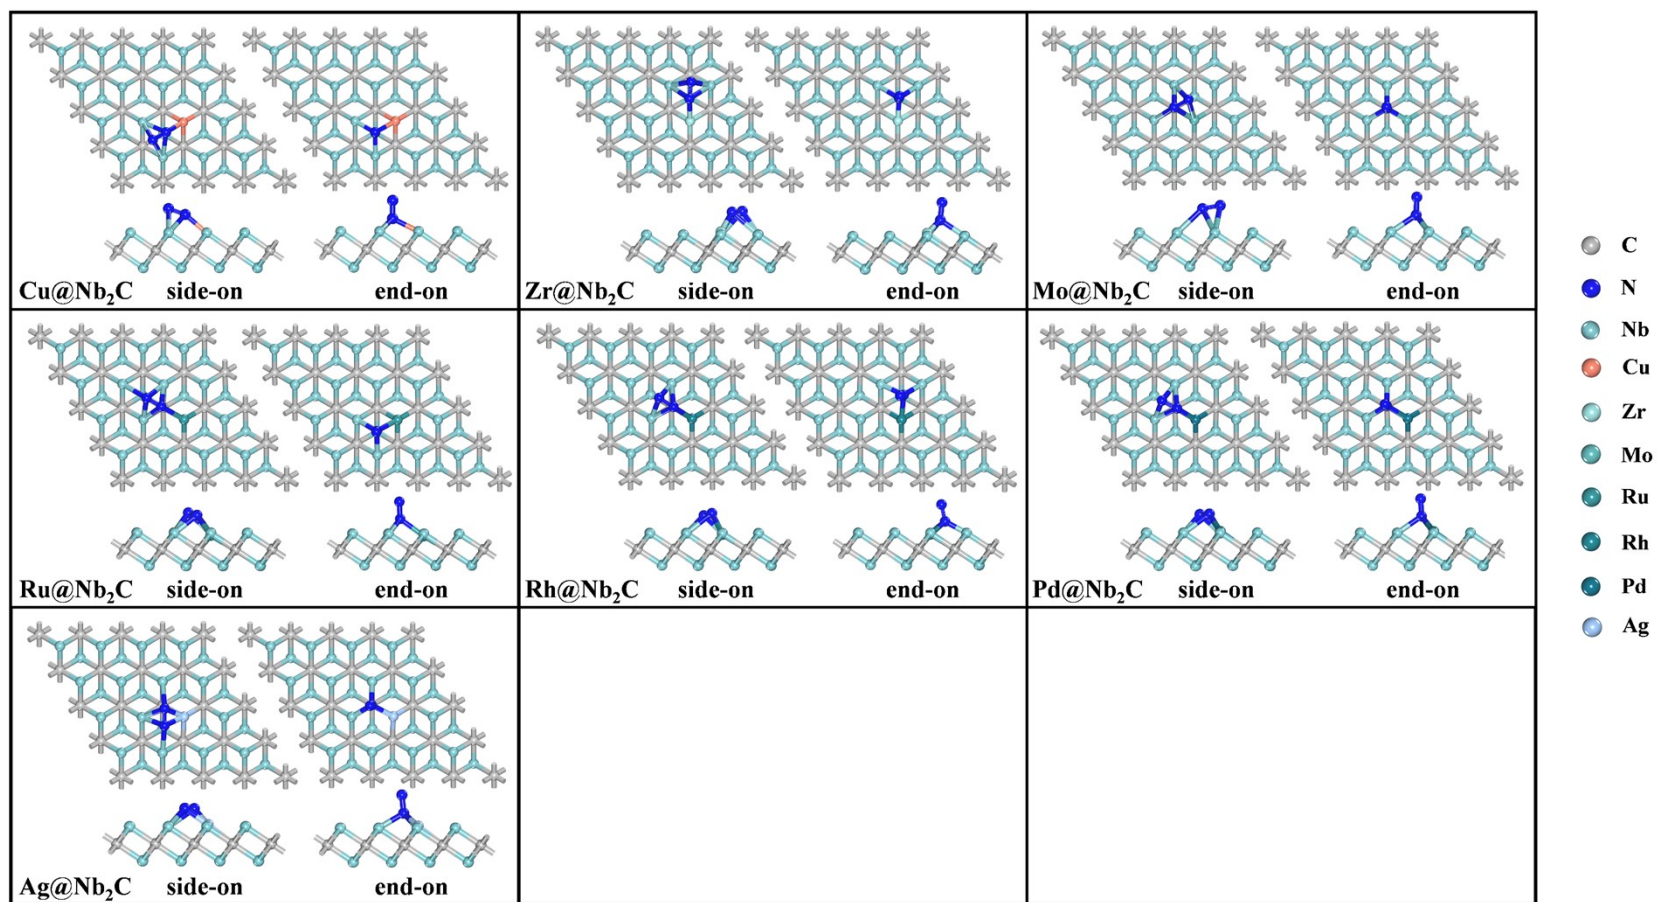

Fig. S4 Top and side views of the optimized adsorption configurations for  $N_2$  on  $TM@Nb_2C$  ( $TM = Cu, Zr, Mo, Ru, Rh, Pd, \text{ and } Ag$ ).

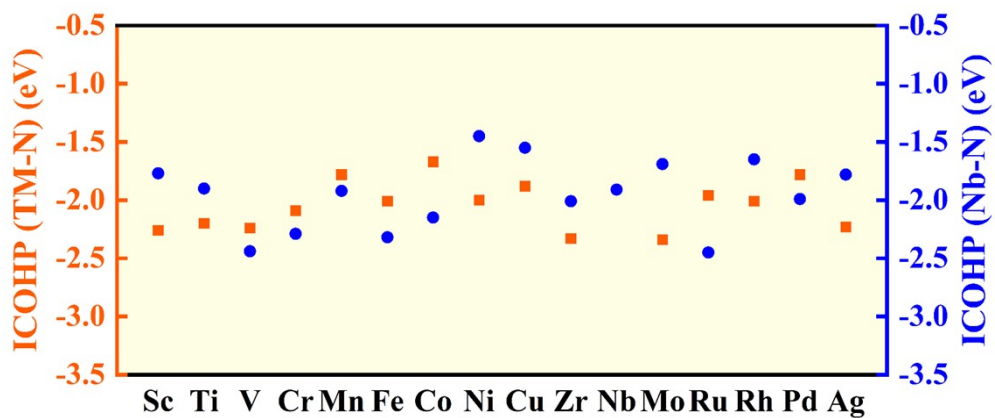

Fig. S5 Mean ICOHP values for the side-on adsorbed  $N_2$  on  $Nb_2C$  and  $TM@Nb_2C$ . Orange squares represent the mean ICOHP of TM–N bonds (left y-axis), and blue circles represent the mean ICOHP of Nb–N bonds (right y-axis). For pristine  $Nb_2C$ , TM–N bonds are absent.

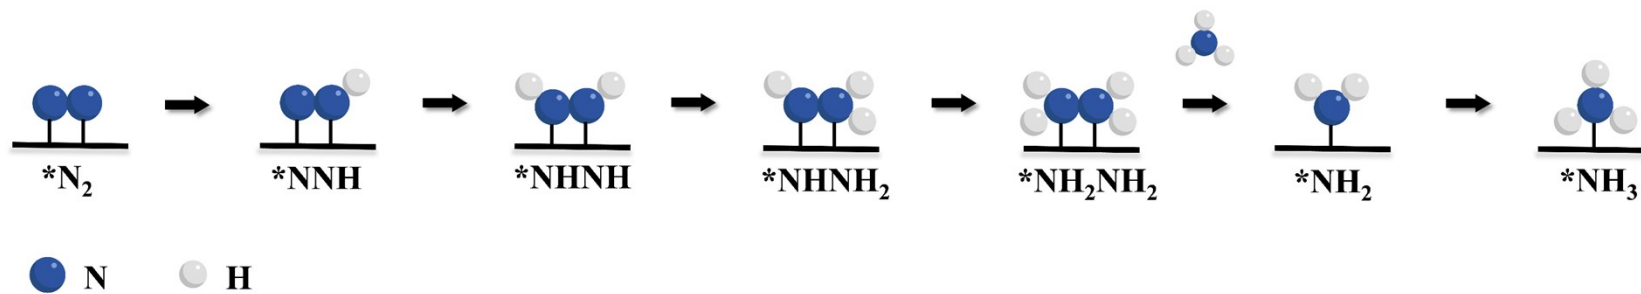

Fig. S6 Schematic illustration of the NRR process.

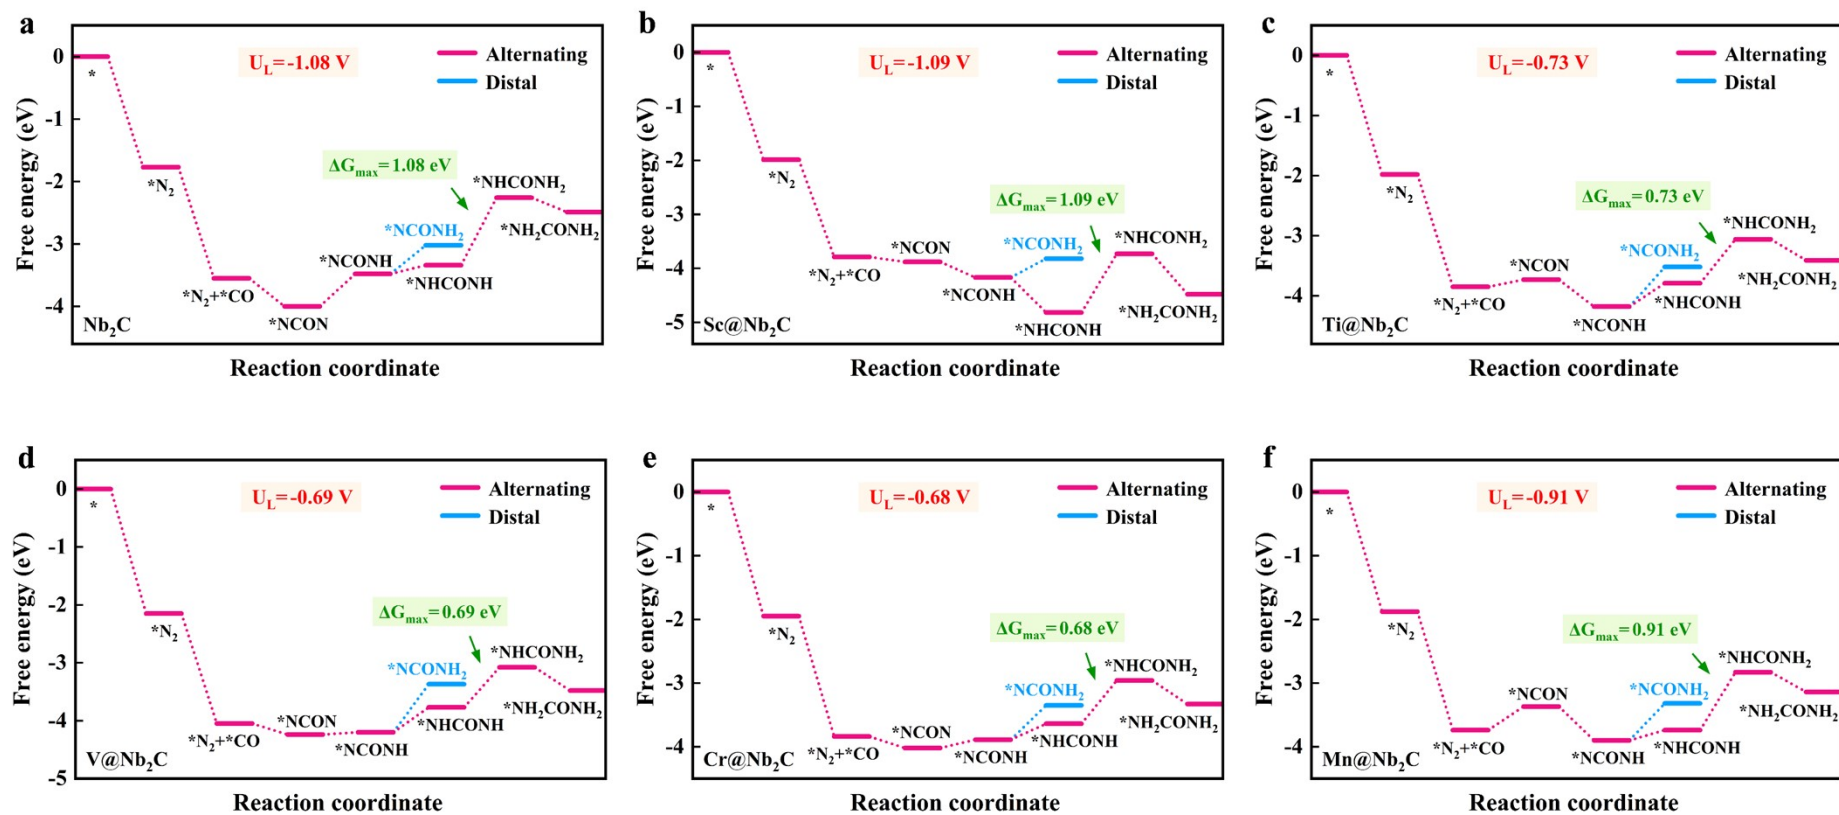

Fig. S7 Free energy diagrams for urea electrosynthesis on (a)  $Nb_2C$ , (b)  $Sc@Nb_2C$ , (c)  $Ti@Nb_2C$ , (d)  $V@Nb_2C$ , (e)  $Cr@Nb_2C$ , and (f)  $Mn@Nb_2C$ .

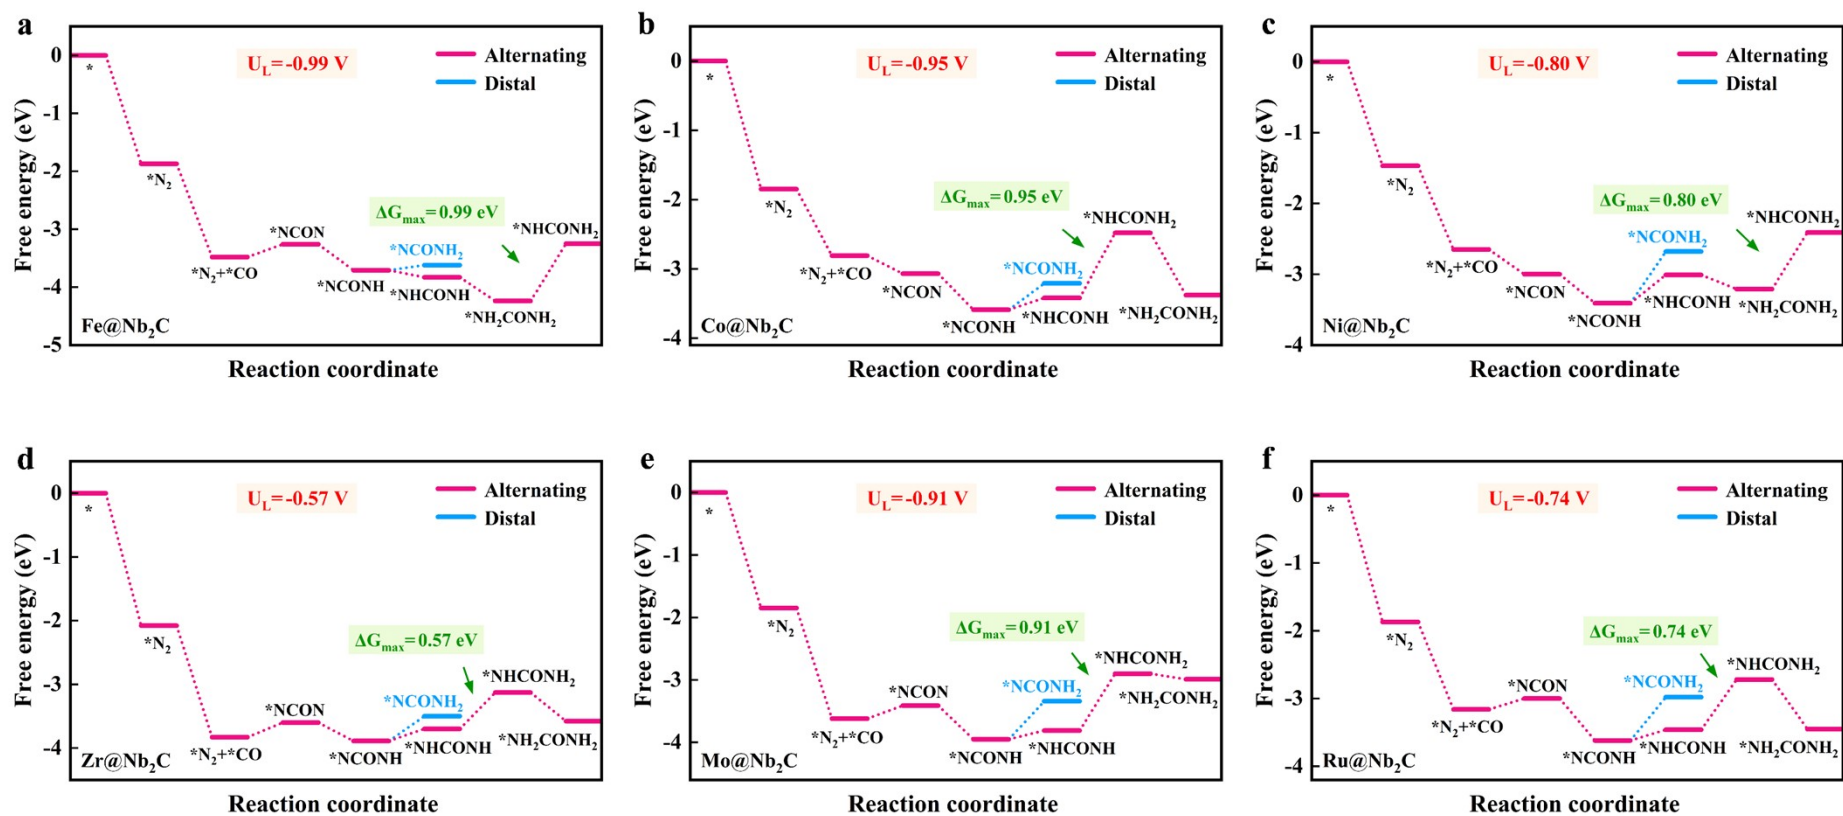

Fig. S8 Free energy diagrams for urea electrosynthesis on (a) Fe@Nb<sub>2</sub>C, (b) Co@Nb<sub>2</sub>C, (c) Ni@Nb<sub>2</sub>C, (d) Zr@Nb<sub>2</sub>C, (e) Mo@Nb<sub>2</sub>C, and (f) Ru@Nb<sub>2</sub>C.

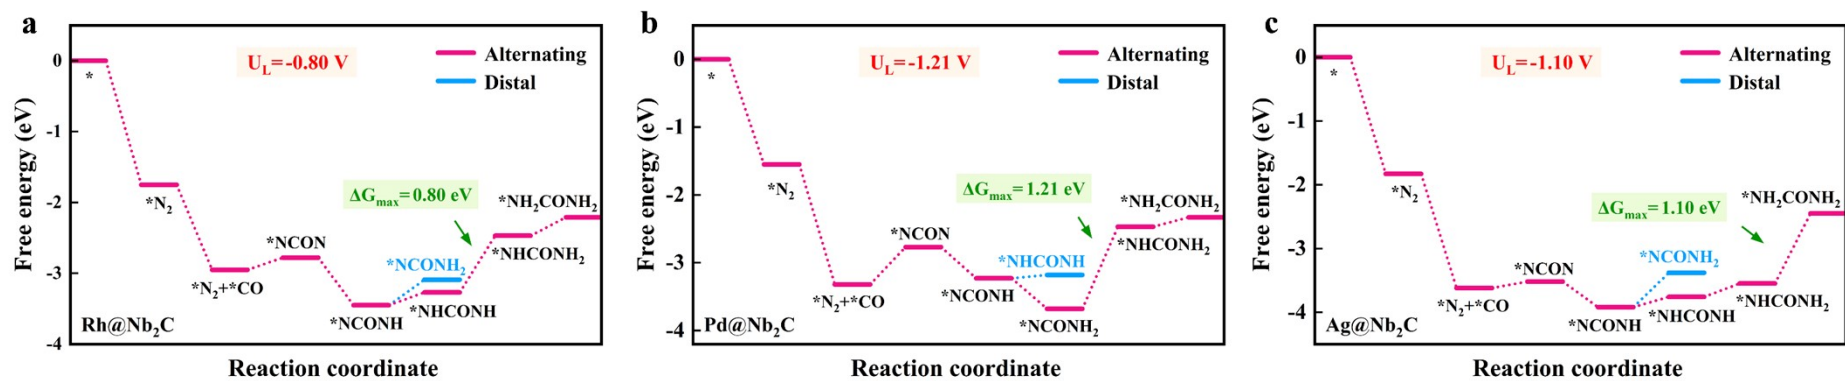

Fig. S9 Free energy diagrams for urea electrosynthesis on (a) Rh@Nb<sub>2</sub>C, (b) Pd@Nb<sub>2</sub>C, and (c) Ag@Nb<sub>2</sub>C.

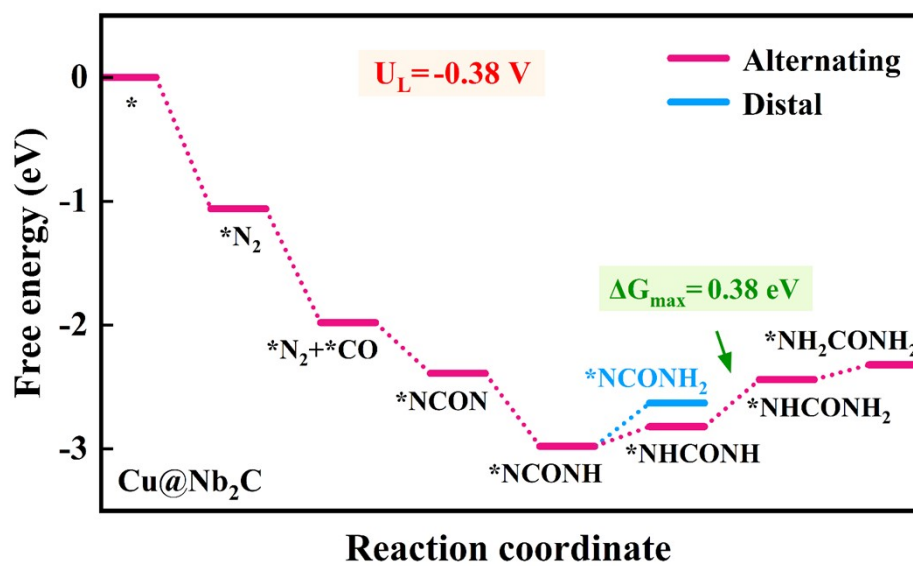

Fig. S10 Free energy diagram for urea electrosynthesis on Cu@Nb<sub>2</sub>C including solvent effects.

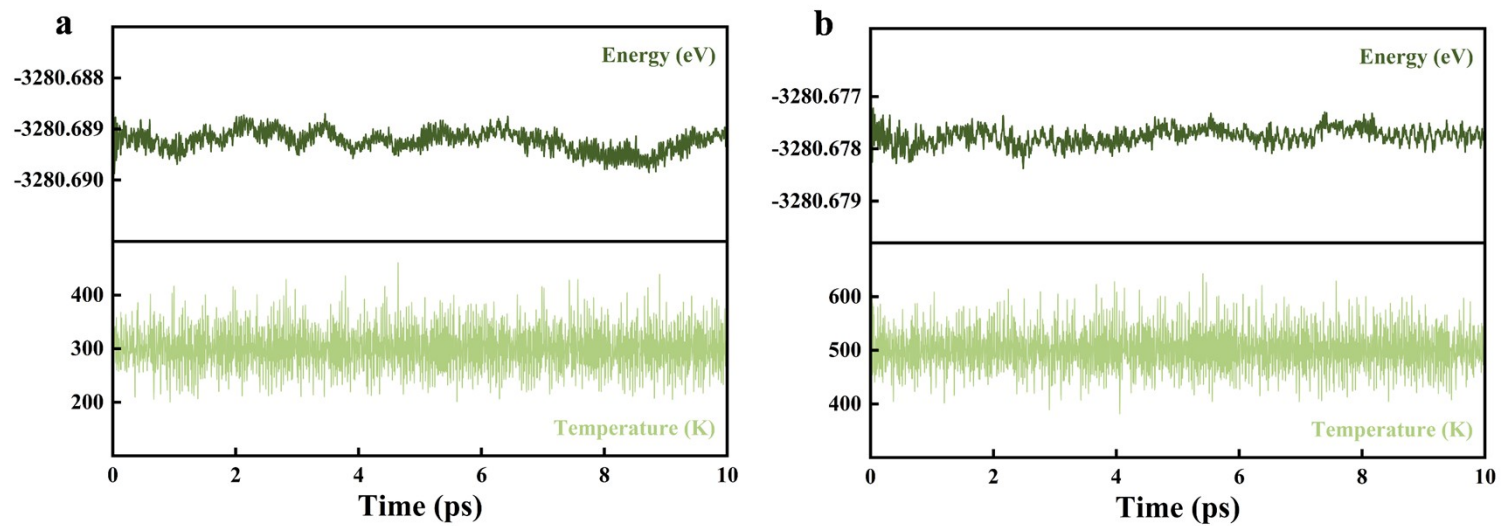

Fig. S11 AIMD simulations of Cu@Nb<sub>2</sub>C (a) at 300 K and (b) 500 K.

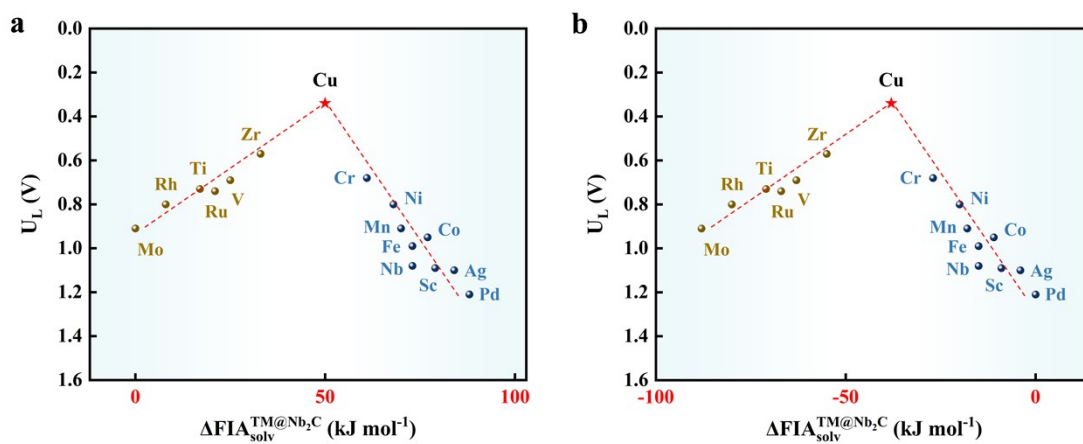

Fig. S12 Volcano plot showing the relationship between the solvation-corrected relative fluoride ion affinity ( $\Delta FIA_{solv}^{TM@Nb_2C}$ ) and the limiting potential for urea synthesis ( $U_L$ ), with the reference zero set to the solvated fluoride ion affinity of (a) Mo@Nb<sub>2</sub>C and (b) Pd@Nb<sub>2</sub>C.

Table S1. Calculated Hirshfeld charges ( $|e|$ ) for the TM dopant site, and the average charges of the o-Nb and m-Nb sites on Nb<sub>2</sub>C and TM@Nb<sub>2</sub>C.

| System               | q(TM) | q(o-Nb) | q(m-Nb ) |
|----------------------|-------|---------|----------|
| Nb <sub>2</sub> C    | 0.546 | 0.546   | 0.546    |
| Sc@Nb <sub>2</sub> C | 0.260 | 0.478   | 0.544    |
| Ti@Nb <sub>2</sub> C | 0.149 | 0.463   | 0.568    |
| V@Nb <sub>2</sub> C  | 0.254 | 0.548   | 0.556    |
| Cr@Nb <sub>2</sub> C | 0.279 | 0.550   | 0.552    |
| Mn@Nb <sub>2</sub> C | 0.175 | 0.548   | 0.556    |
| Fe@Nb <sub>2</sub> C | 0.166 | 0.525   | 0.556    |
| Co@Nb <sub>2</sub> C | 0.164 | 0.508   | 0.559    |
| Ni@Nb <sub>2</sub> C | 0.139 | 0.494   | 0.560    |
| Cu@Nb <sub>2</sub> C | 0.112 | 0.497   | 0.560    |
| Zr@Nb <sub>2</sub> C | 0.199 | 0.394   | 0.527    |
| Mo@Nb <sub>2</sub> C | 0.105 | 0.550   | 0.600    |
| Ru@Nb <sub>2</sub> C | 0.149 | 0.536   | 0.558    |
| Rh@Nb <sub>2</sub> C | 0.105 | 0.565   | 0.582    |
| Pd@Nb <sub>2</sub> C | 0.144 | 0.545   | 0.570    |
| Ag@Nb <sub>2</sub> C | 0.286 | 0.539   | 0.572    |

Table S2. Calculated adsorption energy (eV) of \*N<sub>2</sub> on Nb<sub>2</sub>C and TM@Nb<sub>2</sub>C.

| System               | Side on | End on |
|----------------------|---------|--------|
| Nb <sub>2</sub> C    | -2.22   | -1.10  |
| Sc@Nb <sub>2</sub> C | -2.55   | -1.07  |
| Ti@Nb <sub>2</sub> C | -2.57   | -1.08  |
| V@Nb <sub>2</sub> C  | -2.71   | -1.11  |
| Cr@Nb <sub>2</sub> C | -2.66   | -1.12  |
| Mn@Nb <sub>2</sub> C | -2.30   | -1.12  |
| Fe@Nb <sub>2</sub> C | -2.62   | -0.94  |
| Co@Nb <sub>2</sub> C | -2.47   | -1.12  |
| Ni@Nb <sub>2</sub> C | -1.91   | -1.11  |
| Cu@Nb <sub>2</sub> C | -1.96   | -0.99  |
| Zr@Nb <sub>2</sub> C | -2.63   | -1.07  |
| Mo@Nb <sub>2</sub> C | -2.34   | -1.11  |
| Ru@Nb <sub>2</sub> C | -2.39   | -1.11  |
| Rh@Nb <sub>2</sub> C | -2.24   | -1.11  |
| Pd@Nb <sub>2</sub> C | -1.94   | -1.10  |
| Ag@Nb <sub>2</sub> C | -2.40   | -1.12  |

Table S3. N–N ( $d_{\text{N-N}}$ ) and C–O ( $d_{\text{C-O}}$ ) bond lengths (Å) for N<sub>2</sub> and CO co-adsorbed on Nb<sub>2</sub>C and TM@Nb<sub>2</sub>C.

| System               | $d_{\text{N-N}}$ | $d_{\text{C-O}}$ |
|----------------------|------------------|------------------|
| Nb <sub>2</sub> C    | 1.296            | 1.233            |
| Sc@Nb <sub>2</sub> C | 1.304            | 1.238            |
| Ti@Nb <sub>2</sub> C | 1.338            | 1.234            |
| V@Nb <sub>2</sub> C  | 1.328            | 1.236            |
| Cr@Nb <sub>2</sub> C | 1.311            | 1.241            |
| Mn@Nb <sub>2</sub> C | 1.301            | 1.234            |
| Fe@Nb <sub>2</sub> C | 1.293            | 1.233            |
| Co@Nb <sub>2</sub> C | 1.286            | 1.234            |
| Ni@Nb <sub>2</sub> C | 1.292            | 1.236            |
| Cu@Nb <sub>2</sub> C | 1.303            | 1.240            |
| Zr@Nb <sub>2</sub> C | 1.307            | 1.248            |
| Mo@Nb <sub>2</sub> C | 1.318            | 1.232            |
| Ru@Nb <sub>2</sub> C | 1.280            | 1.235            |
| Rh@Nb <sub>2</sub> C | 1.260            | 1.256            |
| Pd@Nb <sub>2</sub> C | 1.329            | 1.237            |
| Ag@Nb <sub>2</sub> C | 1.300            | 1.245            |

Table S4. Calculated adsorption energy of \*N<sub>2</sub> and \*CO in their co-adsorption state (eV) on Nb<sub>2</sub>C and TM@Nb<sub>2</sub>C.

| System               | N <sub>2</sub> | CO    | Difference |
|----------------------|----------------|-------|------------|
| Nb <sub>2</sub> C    | -2.22          | -2.08 | -0.14      |
| Sc@Nb <sub>2</sub> C | -2.55          | -2.21 | -0.34      |
| Ti@Nb <sub>2</sub> C | -2.57          | -2.43 | -0.14      |
| V@Nb <sub>2</sub> C  | -2.71          | -2.63 | -0.08      |
| Cr@Nb <sub>2</sub> C | -2.66          | -2.49 | -0.17      |
| Mn@Nb <sub>2</sub> C | -2.30          | -2.18 | -0.12      |
| Fe@Nb <sub>2</sub> C | -2.62          | -2.12 | -0.50      |
| Co@Nb <sub>2</sub> C | -2.47          | -2.17 | -0.30      |
| Ni@Nb <sub>2</sub> C | -1.91          | -1.87 | -0.04      |
| Cu@Nb <sub>2</sub> C | -1.96          | -1.76 | -0.35      |
| Zr@Nb <sub>2</sub> C | -2.63          | -2.21 | -0.42      |
| Mo@Nb <sub>2</sub> C | -2.34          | -1.98 | -0.36      |
| Ru@Nb <sub>2</sub> C | -2.39          | -2.01 | -0.38      |
| Rh@Nb <sub>2</sub> C | -2.24          | -1.93 | -0.31      |
| Pd@Nb <sub>2</sub> C | -1.94          | -1.79 | -0.15      |
| Ag@Nb <sub>2</sub> C | -2.40          | -2.08 | -0.32      |

## References

- 1 J. A. Dean, *Lange's Handbook of Chemistry*, McGraw-Hill, New York, 15th edn, 1999.
- 2 D. W. Smith, *J. Chem. Educ.*, 1977, **54**, 540.
- 3 P. J. Linstrom and W.G. Mallard, *NIST Chemistry WebBook*, NIST Standard Reference Database Number 69, National Institute of Standards and Technology, Gaithersburg MD, <https://doi.org/10.18434/T4D303>, (accessed March 25, 2026).
